# Supplementary material for: Application of pharmacologically induced transcriptomic profiles to interrogate PI3K-Akt-mTOR pathway activity associated with cancer patient prognosis
Source: PubMed Central journal article supplement (PMC5356650; doi:10.18632/oncotarget.11776), 2016-08-31
Supplement: oncotarget-07-84142-s001.pdf [file oncotarget-07-84142-s001.pdf]

# Application of pharmacologically induced transcriptomic profiles to interrogate PI3K-Akt-mTOR pathway activity associated with cancer patient prognosis

## Supplementary Materials

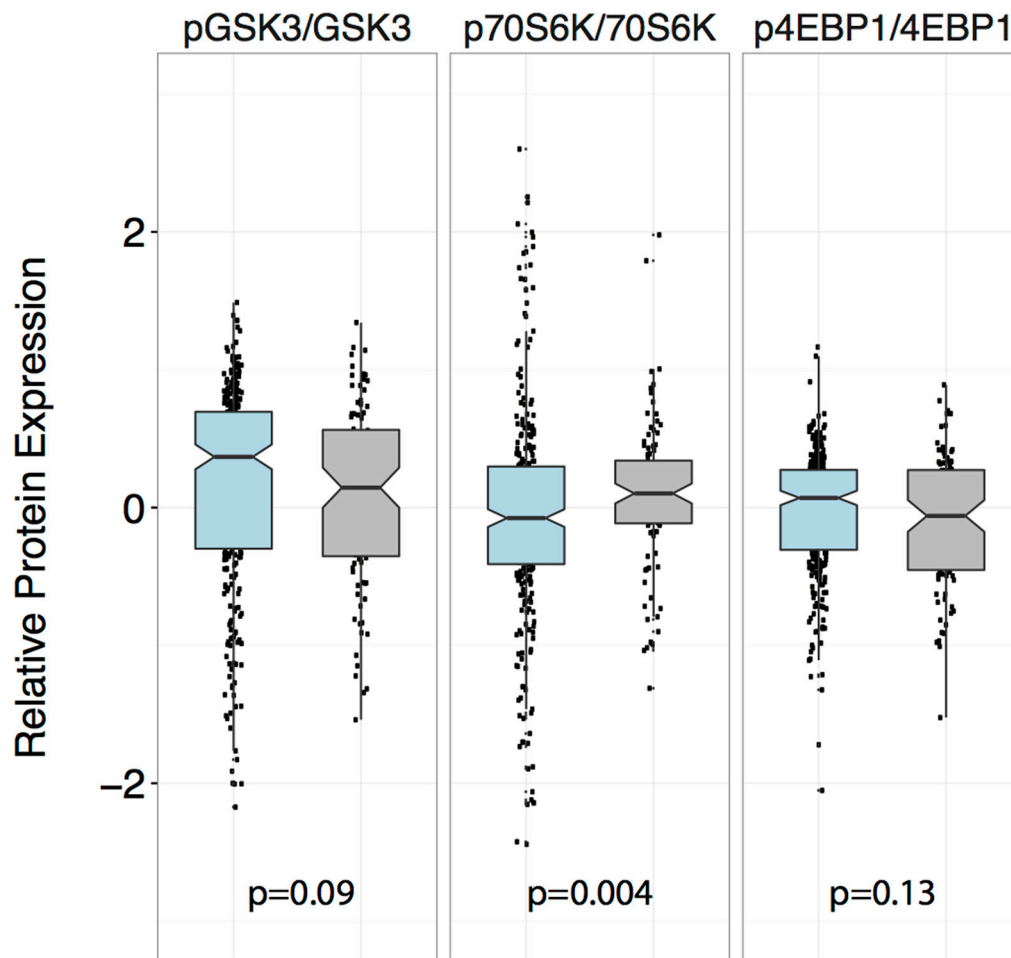

Supplementary Figure S1: Boxplot comparison of pGSK, p70S6K, and p4EBP1 protein expression ratios between ER+ and ER- breast cancer samples.

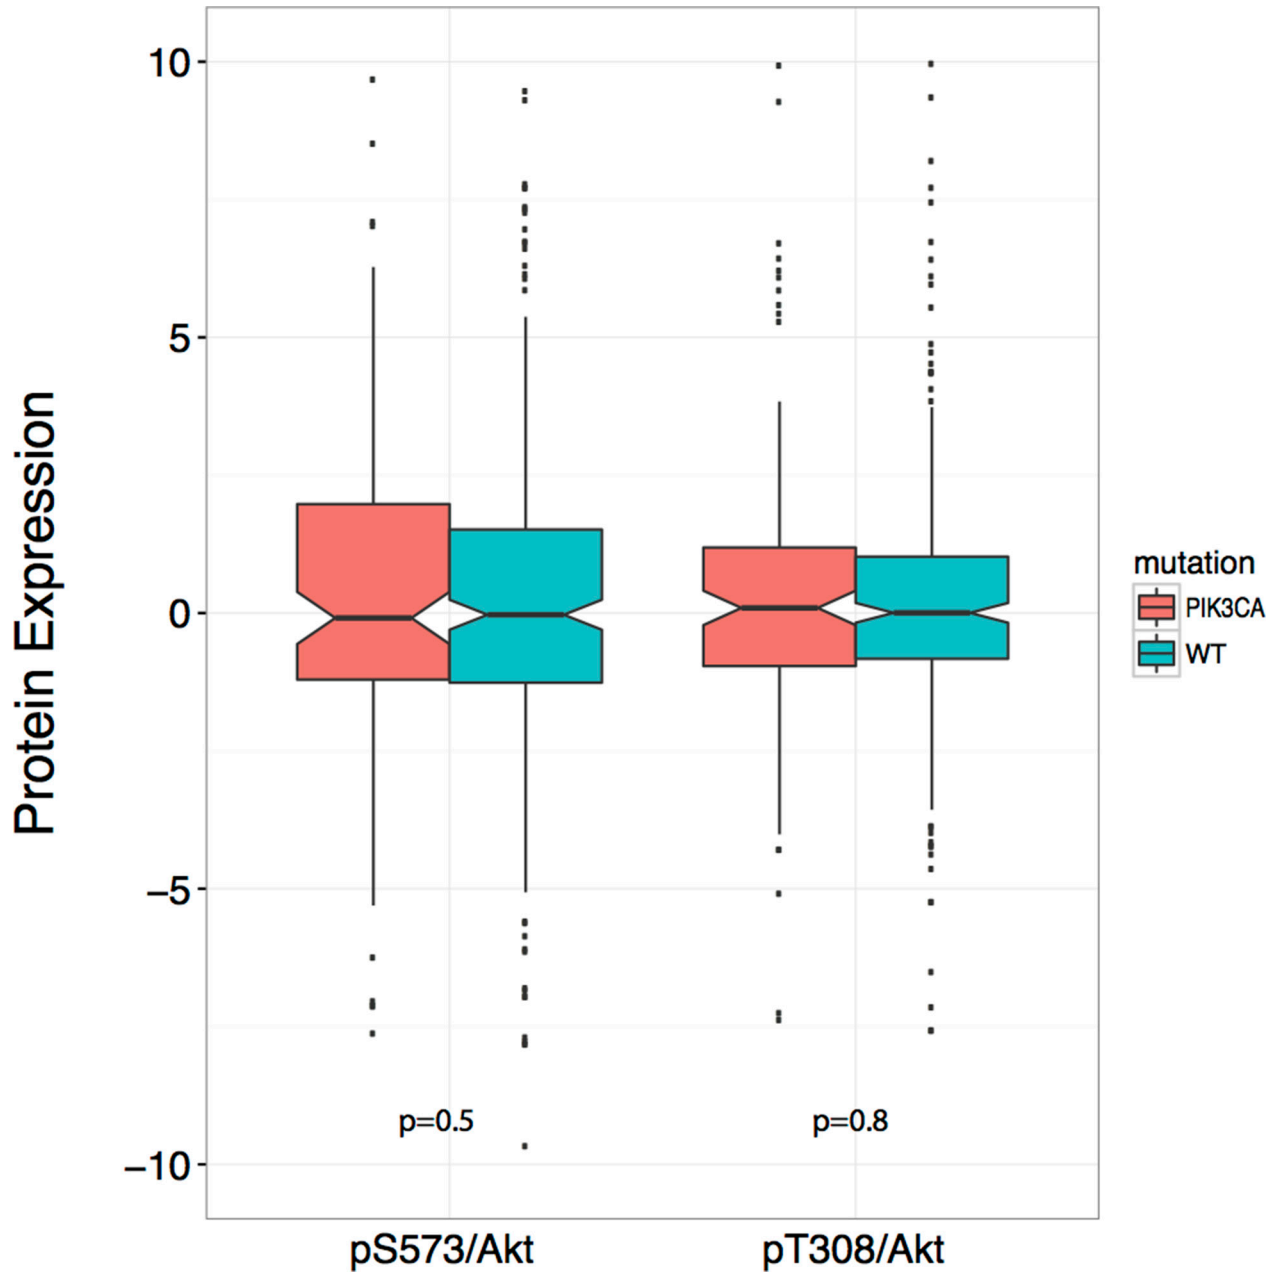

Supplementary Figure S2: Boxplot comparison of pAkt (S573 and T308) protein expression ratios between *PIK3CA* mutant and wild-type breast cancer tumor samples.

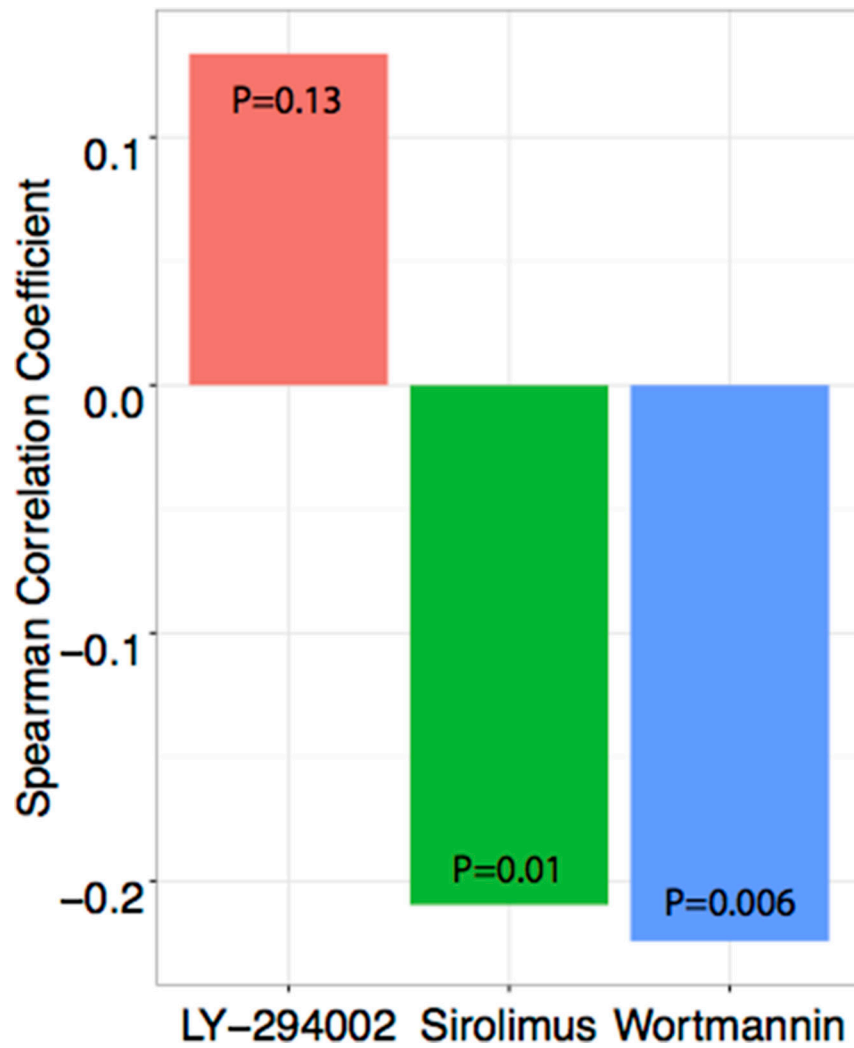

**Supplementary Figure S3: Correlation of PI3K-Akt-mTOR pathway inhibitor DRS with Gleason scores in primary prostate tumors.** Barplot of Spearman correlation coefficients between patient Gleason score and LY-294002, Sirolimus, and Wortmannin DRS, respectively.

**Supplementary Table S1: Univariate Cox regression analysis in breast cancer patients (Curtis) using DRS generated from nine different drug/cell-line combinations**

| Drug       | Univariate Cox Regression Analysis |                  |          |
|------------|------------------------------------|------------------|----------|
|            | Cell Line                          | HR (95% CI)      | P Value  |
| Wortmannin | MCF7                               | 0.96 (0.95–0.97) | 6.32E-21 |
|            | PC3                                | 0.96 (0.95–0.97) | 6.30E-12 |
|            | HL60                               | 0.98 (0.96–0.99) | 2.90E-04 |
| LY-294002  | MCF7                               | 0.97 (0.95–0.99) | 5.60E-04 |
|            | PC3                                | 1.03 (1.01–1.05) | 2.90E-03 |
|            | HL60                               | 0.99 (0.96–1.02) | 5.30E-01 |
| Sirolimus  | MCF7                               | 0.95 (0.94–0.96) | 2.03E-16 |
|            | PC3                                | 0.97 (0.96–0.98) | 2.00E-12 |
|            | HL60                               | 0.95 (0.94–0.97) | 1.10E-08 |

Abbreviations: HR = hazard ratio; 95% CI = 95% confidence interval.
